# Supplementary material for: MEP pathway products allosterically promote monomerization of deoxy-D-xylulose-5-phosphate synthase to feedback-regulate their supply
Source: PubMed Central journal article supplement — Plant Commun. 2022 Dec 26;4(3):100512. doi: 10.1016/j.xplc.2022.100512 (PMC10203381; doi:10.1016/j.xplc.2022.100512), 2022-12-26
Supplement: mmc1.pdf [file mmc1.pdf]

**Plant Communications, Volume 4**

**Supplemental information**

**MEP pathway products allosterically promote monomerization of deoxy-D-xylulose-5-phosphate synthase to feedback-regulate their supply**

**Xueni Di, David Ortega-Alarcon, Ramu Kakumanu, Javier Iglesias-Fernandez, Lucia Diaz, Edward E.K. Baidoo, Adrian Velazquez-Campoy, Manuel Rodríguez-Concepción, and Jordi Perez-Gil**

## Supplemental Information

Title:

MEP pathway products allosterically promote monomerization of deoxy-D-xylulose-5-phosphate synthase to feedback regulate their supply.

Authors:

Xueni Di, David Ortega-Alarcon, Ramu Kakumanu, Javier Iglesias-Fernandez, Lucia Diaz, Edward E.K. Baidoo, Adrian Velazquez-Campoy, Manuel Rodríguez-Concepción\*, Jordi Perez-Gil\*

\* Corresponding authors:

Manuel Rodríguez-Concepción ([manuelrc@ibmcp.upv.es](mailto:manuelrc@ibmcp.upv.es))

Jordi Perez-Gil ([jordi.perez@cragenomica.es](mailto:jordi.perez@cragenomica.es))

## Supplemental Tables

**Supplemental Table S1:** Strains used in this study

| Name           | Description                                                                                                                                                                                | Antibiotic | Reference  |
|----------------|--------------------------------------------------------------------------------------------------------------------------------------------------------------------------------------------|------------|------------|
| TOP10          | F- <i>mcrA</i> Δ( <i>mrr-hsdRMS-mcrBC</i> ) Φ80 <i>lacZ</i> ΔM15 Δ <i>lacX74 recA</i> <sup>-</sup><br><i>araD139</i> Δ( <i>araleu</i> )7697 <i>galU galK rpsL</i> (StrR) <i>endA1 nupG</i> | -          | Invitrogen |
| BL21(DE3)pLysS | F- <i>ompT hsdSB</i> ( <i>r<sub>B</sub><sup>-</sup></i> , <i>m<sub>B</sub><sup>-</sup></i> ) <i>gal dcm rne131</i> (DE3) pLysS (Cm <sup>R</sup> )                                          | Cm         | Invitrogen |
| K12 MG1655     | F- lambda- <i>ilvG</i> - <i>rfb</i> -50 <i>rph</i> -1                                                                                                                                      | -          | (1)        |
| EcAB4-10       | K12 MG1655 Δ <i>dxr</i> ::CAT pBAD-yPMD-hPMK-yMVK-EcIDI                                                                                                                                    | Km/Cm      | (2)        |
| EcAM5-1        | BL21(DE3) pBAD-yPMD-hPMK-yMVK-EcIDI                                                                                                                                                        | Km         | (3)        |

**Cm:** Chloramphenicol, **Km:** Kanamycin

1. **Blattner et al.**, (1997). The complete genome sequence of *Escherichia coli* K-12. *Science* 277: 1453-1462.
2. **Sauret-Güeto et al.**, (2006). A mutant pyruvate dehydrogenase E1 subunit allows survival of *Escherichia coli* strains defective in 1-deoxy-D-xylulose 5-phosphate synthase. *FEBS Lett.* 580: 736-740.
3. **Rodriguez-Villalon et al.**, (2008). Carotenoid accumulation in bacteria with enhanced supply of isoprenoid precursors by upregulation of exogenous or endogenous pathways. *J. Biotechnol.* 135: 78-84.

**Supplemental Table S2:** Plasmids and primers used in this study.

| Type              |          |                                                               |                |                    |
|-------------------|----------|---------------------------------------------------------------|----------------|--------------------|
| Plasmids          | Backbone | Source                                                        | Cloning method | Tag                |
| pET23-EcDXS       | pET23    | Novagen                                                       | Ligation       | 6xHis (C-terminal) |
| pET23-SIDXS1      | pET23    | Novagen                                                       | Ligation       | 6xHis (C-terminal) |
| pGWB420-SIDXS1    | pGWB420  | (1)                                                           | Gateway        | myc (C-terminal)   |
| pGWB405-SIDXS1    | pGWB405  | (1)                                                           | Gateway        | GFP (C-terminal)   |
| Primers           | Use      | 5' - 3' Sequence                                              |                |                    |
| EcDXS_NdeI-F      | Ligation | CGGCATATGAGTTTTGATATTGC                                       |                |                    |
| EcDXS_XhoI-R      | Ligation | ATTCTCGAGTGCCAGCCAGGCCTTG                                     |                |                    |
| NheI_myc_SIDXS1-F | Ligation | ATGGCTAGCGAACAACAAAACATCTCTCAGAAGAGGATCTGGCTTCCTTATCAGAATCTGG |                |                    |
| SIDXS1_XhoI-R     | Ligation | CTTACTCGAGTGTCATGACCTCTAGAGCCTCTC                             |                |                    |
| GW_SIDXS1-F       | Gateway  | GGGGACAAGTTTGTACAAAAAAGCAGGCTCGATGGCTTTGTGTGCTTATGCAT         |                |                    |
| GW_SIDXS1-R       | Gateway  | GGGGACCACTTTGTACAAGAAAGCTGGGTCTGTCTGACCTCTAGAGC               |                |                    |

1. **Nakagawa et al.**, (2007). Improved Gateway binary vectors: high-performance vectors for creation of fusion constructs in transgenic analysis of plants. *Biosci. Biotechnol. Biochem.* 71: 2095-2100.

## Supplemental Figures

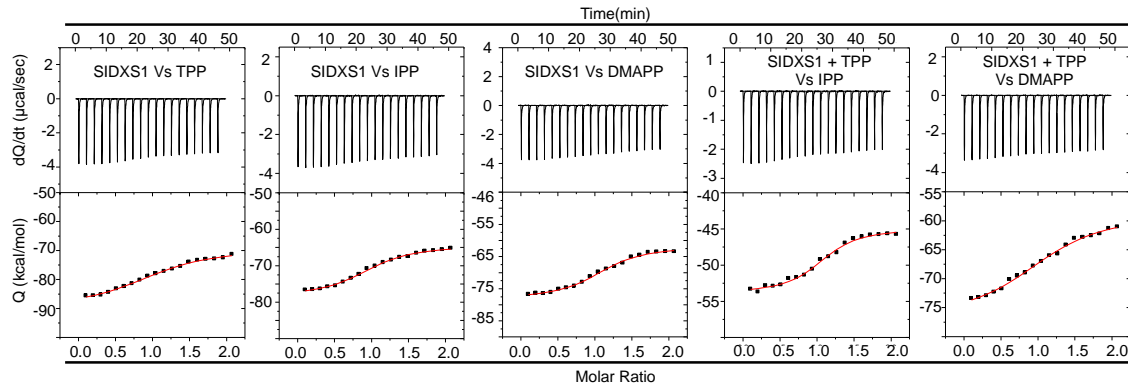

**Supplemental Fig S1. Analysis of SIDXS1 interaction with metabolite ligands.** ITC plots were obtained from the titration of 20  $\mu\text{M}$  SIDXS1 (either alone or with 100  $\mu\text{M}$  TPP) with 200  $\mu\text{M}$  TPP, IPP or DMAPP as indicated. Assays were performed at 25  $^{\circ}\text{C}$  in 50 mM HEPES, 150 mM NaCl buffer. The plots in the upper panel show the thermogram (raw thermal power as a function of time), and the plots in the lower panel show the binding isotherm (heat released per injection normalized per mole of ligand injected as a function of the molar ratio, [ligand]/[protein], in the calorimetric cell). The solid lines represent the best fits of the experimental data after non-linear least-squares analysis using a single-site binding model.

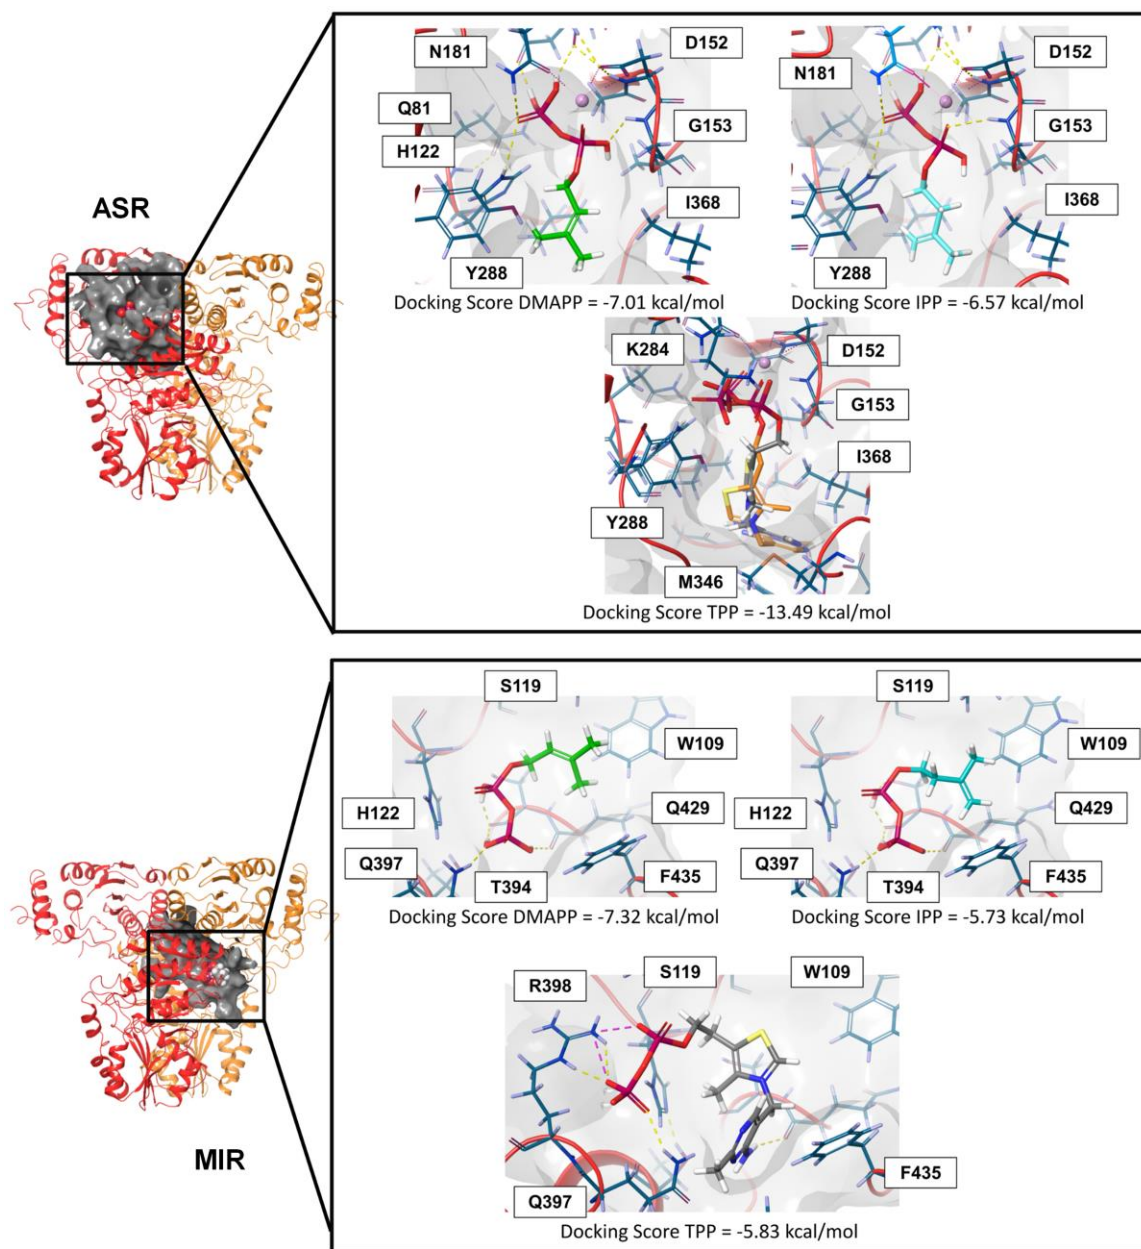

**Supplemental Fig. S2. EcdXS ligand binding site prediction.** Binding sites for ligands are shown in grey: active site region (ASR) and monomer interacting region (MIR). DMAPP, IPP, and TPP carbon atoms are shown in green, cyan, and gray, respectively. In the ASR, the reported binding mode of TPP in the X-ray structure is shown using orange carbon atoms. Residues interacting with ligands are shown, and important residues identified by docking calculations are labeled. Ligand-protein interaction energies are provided in kcal/mol. Hydrogen, oxygen, nitrogen, sulfur, and phosphorous atoms are coloured in white, red, blue, yellow, and purple, respectively.

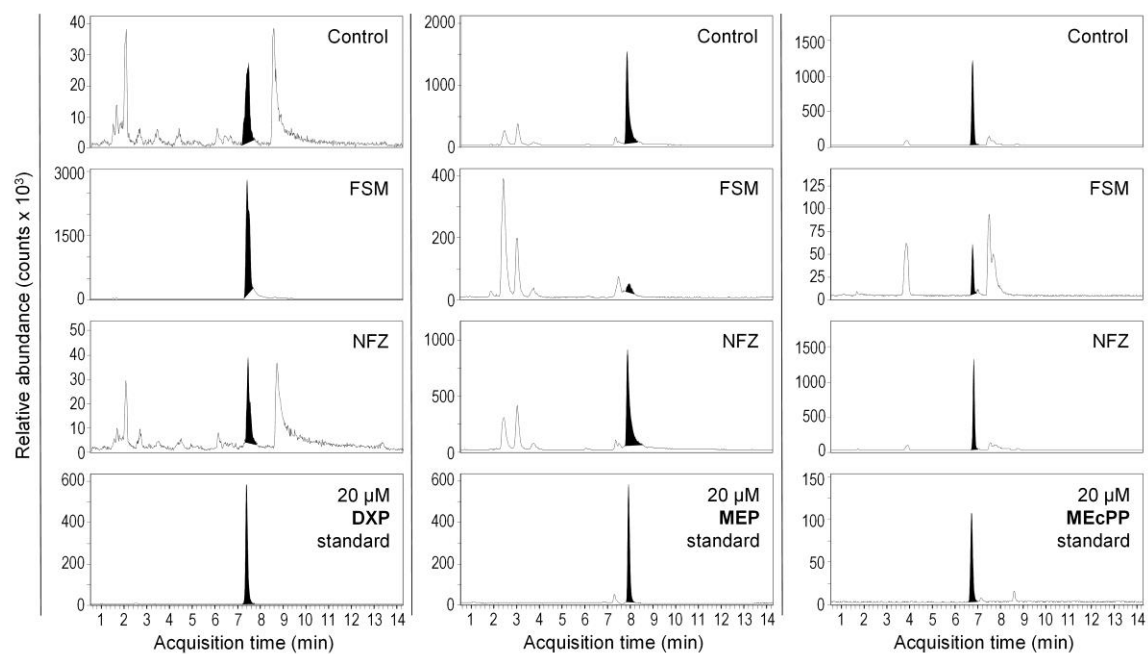

**Supplemental Fig S3. LC-MS chromatograms of plant samples.** MEP pathway metabolites were identified in extracts of *N. benthamiana* leaves treated with the indicated inhibitors or a mock solution (control) using mass-to-charge ( $m/z$ ) ratios of 214.024 (DXP), 216.04 (MEP), and 277.996 (MEcPP). Retention times of commercial standards is shown in the bottom plots.
